# Supplementary material
Source: PubMed Central journal article supplement (PMC4396159)
Supplement: ajsc0004-0038-f6.pdf [file ajsc0004-0038-f6.pdf]

# Cryopreservation for hPSCs on feeder-free condition

## Materials and methods

### *In vitro differentiation*

hPSCs harvested with GCDR were transferred to ultra-low attachment 6-well dish (Corning, NY 14831) to demonstrate three germ layer differentiation potential through the formation of embryoid bodies (EBs) for 6-14 days with hPSC medium, Dulbecco's modified Eagle's medium (D-MEM)/F12 (SIGMA, cat # D6421), supplemented with 20% knockout serum replacement (KSR; GIBCO, cat # 10828-028), 2 mM GlutaMax™ (Nacalai Tesque, 16948-04), 1% non-essential amino acids (GIBCO, cat # 11140-050), 0.1 mM 2-mercaptoethanol (GIBCO, cat # 21985), and penicillin-streptomycin (Nacalai Tesque, cat # 26253-84). EBs were transferred to 6-well dish coated with 0.1% gelatin (SIGMA, G1890) for RNA extraction or 12-well dish for IHC. Expression of lineage-specific genes was examined by IHC after 10-14 days. Molecules representing three germ layer differentiation were detected by IHC using antibodies against  $\beta$ -tubulin (ectoderm), glial fibrillary acidic protein (GFAP; ectoderm), vimentin (mesoderm), and desmin (mesoderm) and visualized with secondary antibodies labeled with Alexa Fluor 594 (Invitrogen™). Nuclei were stained with DAPI (Invitrogen™). A fluorescence microscope (OLYMPUS, IX71) was used for fluorescent observation. All antibodies for lineage-specific analysis are listed in [Table S1](#).

### *Teratoma formation assay*

hPSCs ( $4.0 \times 10^6$  cells) cultured over five passages after thawing were used for teratoma formation assays, performed by transplanting them under the epidermal space of the left testis of NSG (NOD. *Cg-Prkdc<sup>scid</sup>Il2rg<sup>tm1Wjl</sup>/SzJ*) mice (Charles river, Japan). Ten  $\mu$ L of HBSS buffer (Nacalai Tesque, 09735-75) was injected into the right testis as a negative control. All mice developed teratomas at the injection sites by 10-12 weeks. Teratomas that formed within testicles were fixed with 4% PFA and sectioned, and sections were stained with hematoxylin (Sakura Finetek, Japan) and eosin (Merck Millipore).

## Cryopreservation for hPSCs on feeder-free condition

**Table S1.** List of antibodies used for FACS and IHC

| Antibodies for Immunochemical staining |                                                                                             | Supplier               | Cat No.     | dilution ratio |
|----------------------------------------|---------------------------------------------------------------------------------------------|------------------------|-------------|----------------|
| pluripotent marker                     | POU5F1                                                                                      | SantaCruze             | sc-5279     | 1:200          |
|                                        | NANOG                                                                                       | Reprocell              | RCAB0003P   | 1:200          |
|                                        | NANOG                                                                                       | Cell signaling         | 3580        | 1:800          |
|                                        | SSEA-4                                                                                      | Millipore              | MAB4304     | 1:200          |
|                                        | TRA 1-60                                                                                    | Millipore              | MAB4360     | 1:200          |
|                                        | TRA 1-81                                                                                    | Millipore              | MAB4381     | 1:200          |
| different marker                       | $\beta$ -tubulin                                                                            | SIGMA                  | T4026       | 1:200          |
|                                        | Glial fibrillary acidic protein (GFAP)                                                      | SantaCruze             | sc-6170     | 1:100          |
|                                        | Desmin                                                                                      | Dako                   | M0760       | 1:100          |
|                                        | Vimentin                                                                                    | SIGMA                  | V6630       | 1:200          |
| second antibody                        | Alexa Fluor 488 goat anti-rabbit IgG (H+L)                                                  | Invitrogen             | A11008      | 1:500          |
|                                        | Alexa Fluor 594 rabbit anti-mouse IgG (H+L)                                                 | Invitrogen             | A11062      | 1:500          |
|                                        | Alexa Fluor 594 donkey anti-goat IgG (H+L)                                                  | Invitrogen             | A11058      | 1:500          |
|                                        | DAPI                                                                                        | Invitrogen             | D1306       | 1:500          |
| Antibodies for FACS                    |                                                                                             | Supplier               | Cat No.     |                |
| pluripotent marker                     | SSEA-3                                                                                      | BD                     | 561145      |                |
|                                        | SSEA-4                                                                                      | BD                     | 560126      |                |
|                                        | TRA 1-60                                                                                    | BD                     | 562711      |                |
|                                        | 7AAD                                                                                        | BD                     | 51-68981E   |                |
| Neu5Gc analysis                        | Anti-Neu5Gc antibody kit                                                                    | BioLegend              | 146901      |                |
|                                        | Alexa Fluor 647-AffiniPure F(ab') <sub>2</sub> Fragment Donkey Anti-Chicken IgY (IgG) (H+L) | Jackson ImmunoResearch | 703-606-155 |                |

**Table S2.** List of primers used for qRT-PCR

|                    | Gene      | Accession number | Sequence                 |                            |
|--------------------|-----------|------------------|--------------------------|----------------------------|
| pluripotent marker | POU5F1    | NM_001173531     | F                        | GAAACCCACACTGCAGCAGA       |
|                    |           |                  | R                        | TCGCTTGCCCTTCTGGCG         |
|                    | NANOG     | NM_024865        | F                        | CTCAGCTACAAACAGGTGAAGAC    |
|                    |           |                  | R                        | TCCCTGGTGGTAGGAAGAGTAAA    |
|                    | SOX2      | NM_003106        | F                        | GGGAAATGGGAGGGGTGCAAAGAGG  |
|                    |           |                  | R                        | TTGCGTGAGTGTGGATGGGATTGGTG |
|                    | KLF4      | NM_004235        | F                        | CGCTCCATTACCAAGAGTCAT      |
|                    |           |                  | R                        | CGATCGTCTTCCCCTCTTTG       |
|                    | MYC       | NM_00246         | F                        | CGTCTCCACACATCAGCACAA      |
|                    |           |                  | R                        | TCTTGGCAGCAGGATAGTCCTT     |
|                    | TERT      | NM_198253.2      | F                        | CGTACAGGTTTACGCATGTG       |
|                    |           |                  | R                        | ATGACGCGCAGGAAAAATGT       |
|                    | NODAL     | NM_00100         | F                        | GAAATCCTCGCAACTCATCCA      |
|                    |           |                  | R                        | TGGAGTTGGTTACACGCACTGT     |
|                    | LEFTY2    | NM_00324         | F                        | GCTCAGATGCTGAGCTCTAGTAGGA  |
|                    |           |                  | R                        | GAAACTCCCAGCTGAAAATGTGT    |
| REX1               | NM_174900 | F                | TGCAGGCGGAAATAGAACCT     |                            |
|                    |           | R                | TCATAGCACACATAGCCATCACAT |                            |
| internal control   | GAPDH     | NM_001256799     | F                        | CCACTCCTCCACCTTTGACG       |
|                    |           |                  | R                        | ATGAGGTCCACCACCCTGTT       |

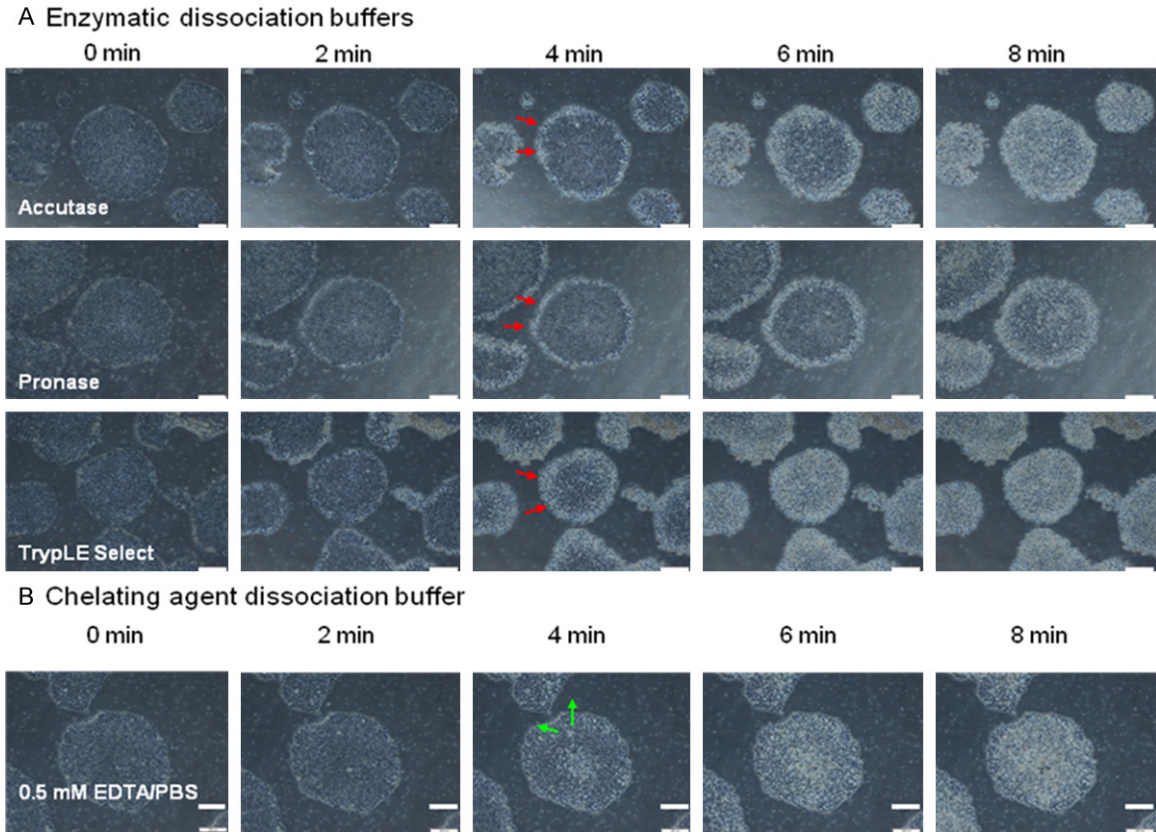

**Figure S1.** Time-lapse photographs of dissociation of KhES-1 cells on rhVTN-N. A. Time-lapse photographs of dissociation of KhES-1 cells on rhVTN-N treated with enzymatic dissociation reagents (Accutase™, Pronase, or TrypLE™ Select). Scale bar = 100 μm. Red arrows show that cell detachment initiated from the rims of the colonies. B. Time-lapse photographs of dissociation of KhES-1 cells on rhVTN-N treated with chelating agent EDTA/PBS(-). Green arrows show that cell detachment initiated from the centers of colonies.

## hPSC maintained as undifferentiated

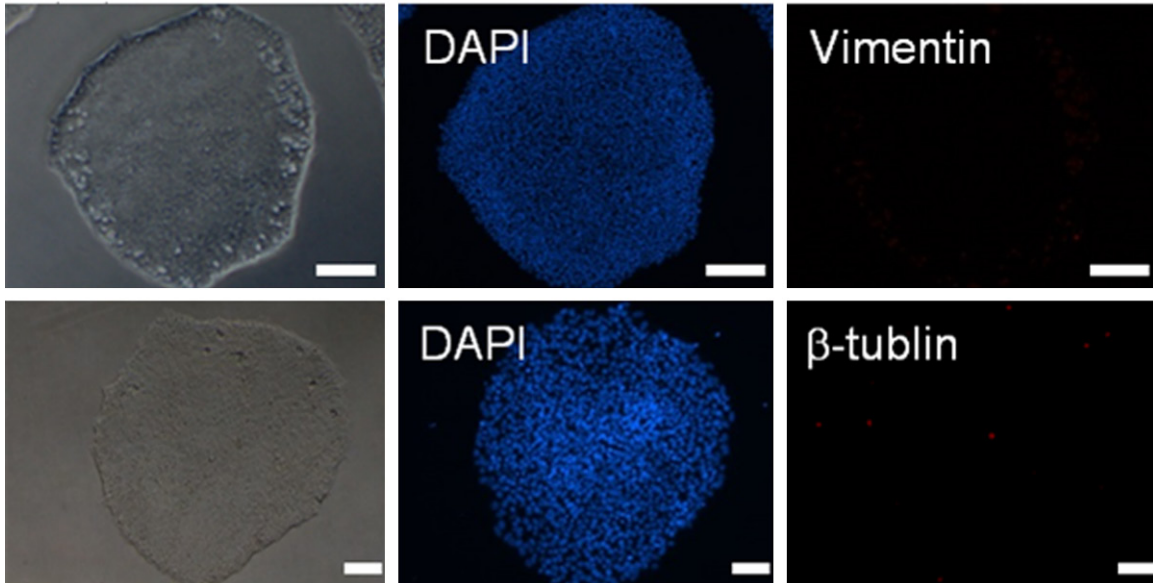

## hPSC started differentiation colony

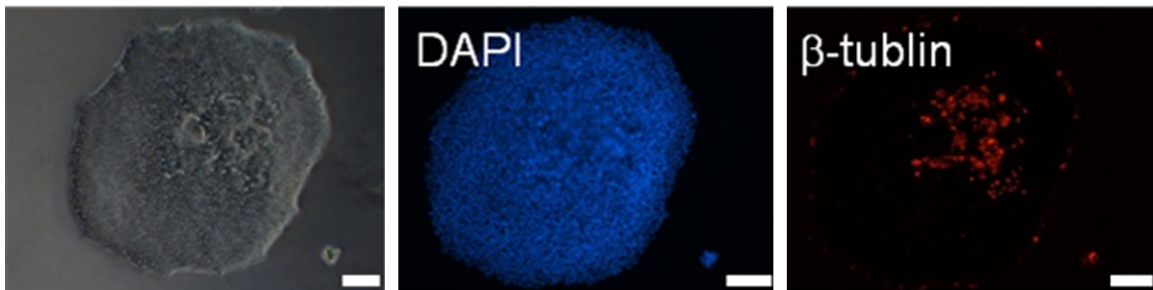

**Figure S2.** Detection of Vimentin and  $\beta$ -tubulin in differentiated cells by ICH. When hPSC (KhES-1) were cultured as undifferentiated state. Mesodermal differentiation marker vimentin or ectodermal differentiation marker  $\beta$ -tubulin was not detected by ICH (Upper panels). While, hPSC (KhES-1) once starts differentiated, Vimentin or  $\beta$ -tubulin was detected in differentiated cells in KhES-1 colony by IHC (lower panels). Bar = 100  $\mu$ m

Cryopreservation for hPSCs on feeder-free condition

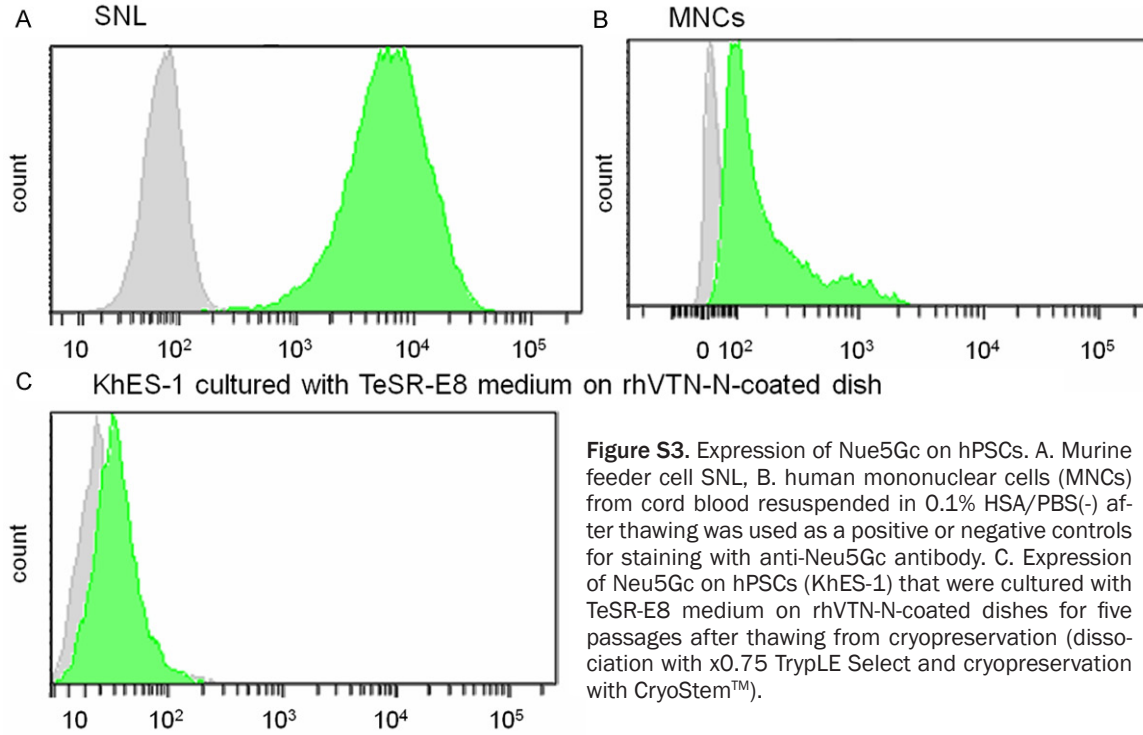

Cryopreservation for hPSCs on feeder-free condition

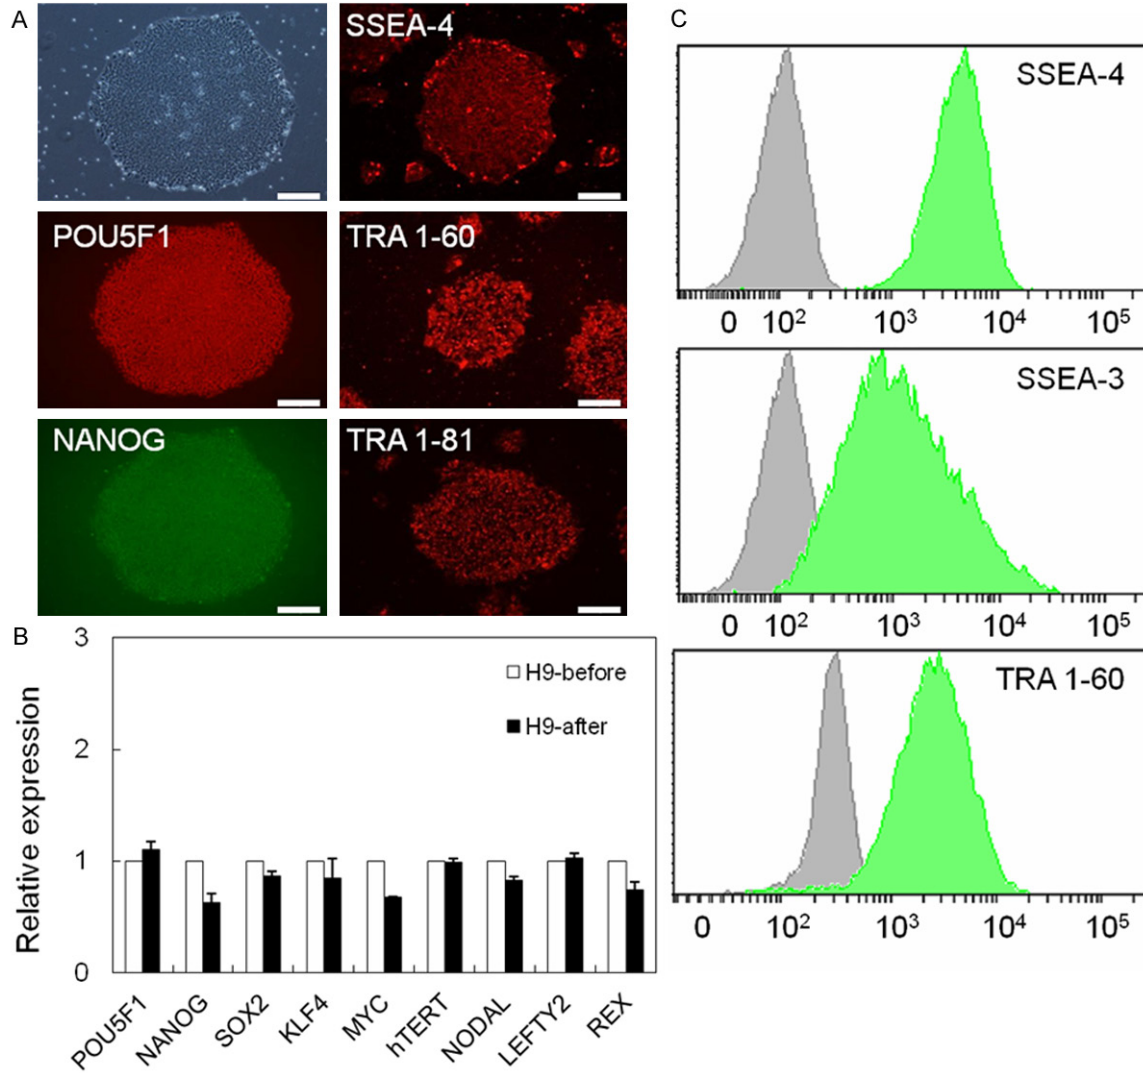

**Figure S4.** Self-renewal potential of thawed hPSCs. **A.** IHC of pluripotency-related molecules (POU5F1, SSEA-4, TRA 1-60, NANOG and TRA 1-81) in human ESCs (H9) at five passages after thawing. These molecules were detected by respective antibodies and visualized with secondary Alexa Fluor 488 (green)- or 594 (red)-labeled antibodies. Scale bars = 200  $\mu$ m. Phase contrast image of H9 is shown in upper left. **B.** Pluripotency-related genes (*POU5F1*, *NANOG*, *SOX2*, *KLF4*, *cMYC*, *hTERT*, *NODAL*, *LEFTY*, and *REX1*) in ES cell line H9 before (H9-before) and six passages after thawing (H9-after) were examined by qRT-PCR. Gene expression was compared by the Ct method. **C.** Flow cytometric analysis of pluripotency-related surface markers (SSEA-3, SSEA-4, and TRA 1-60) in iPS cell line H9 at four passages after thawing.



## Cryopreservation for hPSCs on feeder-free condition

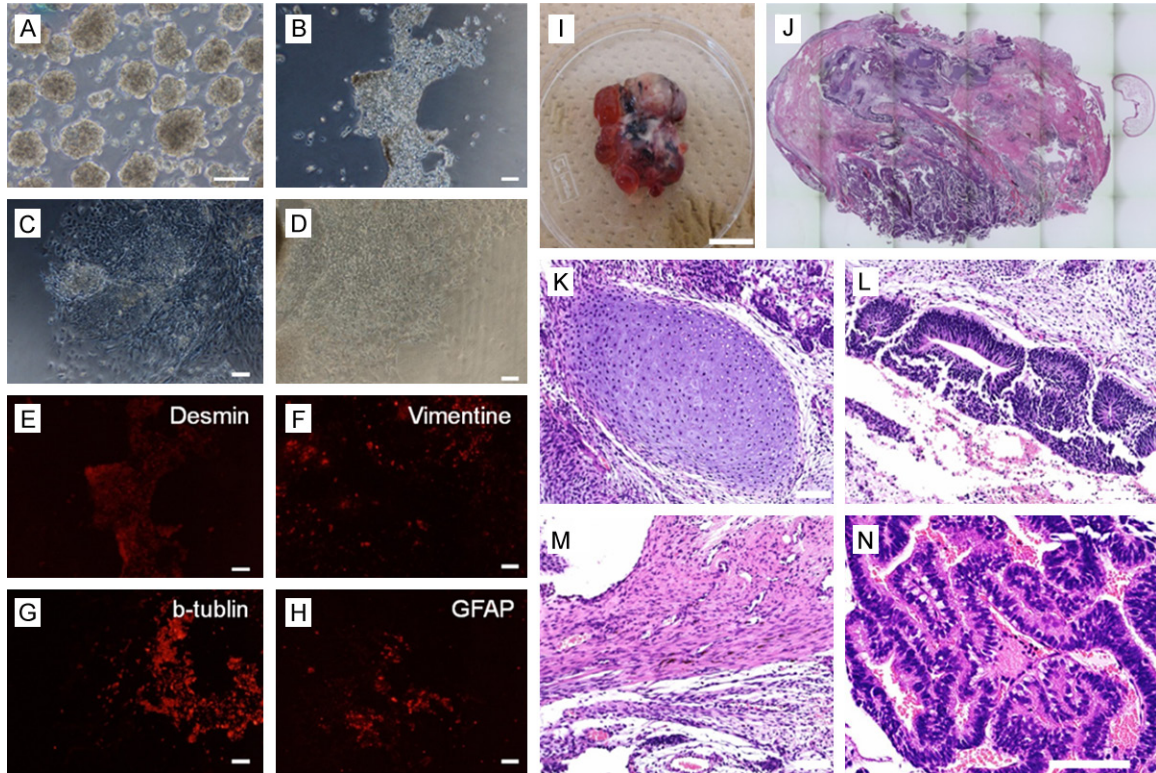

**Figure S5.** Differentiation potential of thawed hPSCs. A. Embryoid body (EBs) formation by KhES-1 cells six passages after thawing. B-D. Adherent cells with various morphologies on 0.1% gelatin-coated dishes from EBs. IHC with E. Desmin (mesoderm), F. Vimentin (mesoderm), G.  $\beta$ -tubulin (ectoderm) or H. GFAP (ectoderm). Alexa Fluor 546 (red) was used to label secondary antibodies. A-H. Scale bars = 100  $\mu$ m. Teratomas from KhES-1 cells six passages after thawing in NSG mice. I. Whole teratoma. Scale bar = 10 mm, J. HE staining of teratoma in cross section, K. Cartilage, L. Neural tube, M. Muscle-like, N. Gut-like tissue in teratoma. K-N. Scale bar = 100  $\mu$ m.
